# Supplementary material for: Parkinson’s disease in real life healthcare organization database: Medication based algorithm, incidence and prodromal symptoms
Source: Research Square preprint supplement (doi:10.21203/rs.3.rs-8253566/v1), 2025-12-22
Supplement: Supplementary file 1 [file 1b5215bf32b830ac44ed631a.docx]

**Supplementary Material**

**Supplementary Table 1: ATC-5 Codes**

**A. APM medication for inclusion criteria**

| ATC Group name | ATC code | Generic name | Mechanism of action |
| --- | --- | --- | --- |
| Dopa and dopa derivatives | N04BA01 | Duodopa pump/levopar/ Dopicar |  |
|  | N04BA02 | Levodopa, Benserazide | Dopamine precursor + inhibitor of dopa Decarboxylase  Dopamine precursor + peripheral dopa  decarboxylase inhibitor + COMT inhibitor |
| Levodopa, Carbidopa |
| N04BA03 | Levodopa, Carbidopa, Entacapone, Stavelo |
|  | N04BA07 | Pro-duodopa sub cutaneous pump * |  |
| Amantadine derivatives | N04BB01 | Amantadine | Dopaminergic, anti-viral |
| Dopamine agonists | N04BC01 | Bromocriptine | Dopamine agonist |
| N04BC02 | Pergolide |
| N04BC04 | Ropinirole |
| N04BC05 | Pramipexole |
| N04BC06 | Cabergoline/ Cabaser/Cabotrim |
| N04BC07 | Apomorphine |  |
| N04BC09 | Rotigotine * |  |
| Monoamine oxidase B inhibitors | N04BD01 | Selegiline | MAO B inhibitor |
| N04BD02 | Rasagiline |
| N04BD03 | Xadago /Safinamide |
| Other dopaminergic agents | N04BX01 | Tolcapone * | COMT inhibitor |
| N04BX02 | Entacapone |
| N04BX04 | Opicapone * |

(*) Not found Clalit’s database

**B. Anticholinergic medication**

| ATC code | Generic name | Medication Name |
| --- | --- | --- |
| N04AA02 | Biperiden | Dekinet/Akineton/Biperdien |
| N04AA01 | Trihexphenidyl | Rodenal/Partane/Artane |
| N04AA03 | Metixene | Tremaril/Tremoquil/Tremarit |
| N04AA04 | Procyclidine | Kemadrin/Procyclidine |

**C. Anti-psychotic medication**

| ATC code | Generic name |
| --- | --- |
| N05AL05 | Amisulpride |
| N05AX12 | Aripiprazole |
| N05AH05 | Asenapine |
| N05AX16 | Brexpiprazole |
| N05AX15 | Cariprazine |
| N05AA01 | Chlorpromazine |
| N05AF03 | Chlorprothixen |
| N05AH06 | Clotiapine |
| N05AH02 | Clozapine |
| N05AF01 | Flupentixol |
| N05AB02 | Fluphenazine |
| N05AD01 | Haloperidol |
| N05AX14 | Iloperidone |
| N05AA02 | Levomepromazine |
| N05AH03 | Olanzapine |
| N05AX13 | Paliperidone |
| N05AG03 | Penfluridol |
| N05AC01 | Periciazine |
| N05AB03 | Perphenazine |
| N05AG02 | Pimozide |
| N05AH04 | Quetiapine (50 mg and above) * |
| N05AX08 | Risperidone |
| N05AE03 | Sertindole |
| N05AL01 | Sulpiride |
| N05AB08 | Thioproperazine |
| N05AC02 | Thioridazine |
| N05AL03 | Tiapride |
| N05AB06 | Trifluoperazine |
| N05AE04 | Ziprasidone |
| N05AF05 | Zuclopenthixol |
| N05AE05 | Lurasidone * |
| N05AG01 | Fluspirilene * |

(*) Not found in Clalit’s database

**TABLE 2.** Possible criteria distribution: The number of PD patients that met each specific criterion.

| **Criterion for Possible PD** | **Male** | **Female** | **Total** | **Total sole criterion** |
| --- | --- | --- | --- | --- |
| Never received a PD diagnosis | 1,913 | 1,930 | 3,843 | 1,464 |
| Diagnosed with dementia with Lewy bodies | 529 | 347 | 876 | 603 |
| Less than 2 years have passed from FPD to death date/left the HMO/data extraction date | 4,110 | 2,755 | 6,865 | 4,399 |
| Purchased APM over 3 years, and more than 2 years have passed since their last APM purchase | 937 | 1,246 | 2,183 | 1,444 |
| Diagnosed with PD and purchased at least one purchase of anti-psychotic prescription during the year before FPD and at least one purchase of Dopa and dopa derivatives medications. | 1,167 | 1,449 | 2,616 | 1,836 |
| Total number meeting 3 possible criteria | 32 | 15 | 47 | - |
| Total number meeting only 2 possible criteria | 1,631 | 1,617 | 3,248 | - |
| Total number meeting only 1 possible criterion | 5,298 | 4,448 | 9,746 | 9,746 |
| Total Possible | 6,961 | 6,080 | 13,041 |  |

Abbreviations: APM: anti-Parkinson medication; FDP- first purchase date.


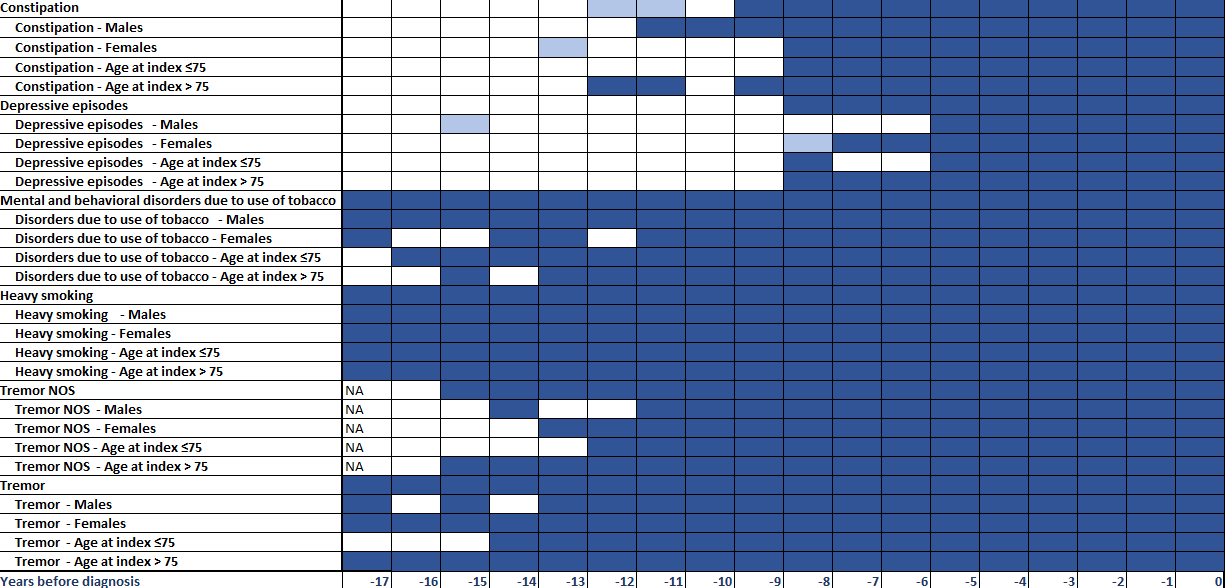


**Supplementary Fig. S1:** Statistical analysis results of the comparison between the prevalence of diagnoses between PD patients and controls for each year before the index date, up to 18 years (-17) before index date. For all the population and segmentized by sex (Male/Female) and age at index (age at index ≤ 75 and age at index > 75). Colors denote significance levels: FDR-adjusted *P*<0.05 (dark blue), *P*<0.05 but FDR-adjusted *P*≥0.05 (light blue), and not significant (white).
